# Supplementary material for: Relationship between activation energy and pre-exponential factor normalized by the number of Brønsted acid sites in cracking of short chain alkanes on zeolites
Source: Royal Society of Chemistry journal article supplement (doi:10.1039/c4cy01483a), 2014-12-09
Supplement: c4cy01483a1.pdf [file c4cy01483a1.pdf]

Supporting information of

# Relationship between Activation Energy and Pre-exponential Factor Normalized by Number of Brønsted Acid Sites in Cracking of Short Chain Alkanes on Zeolites

Naonobu Katada,<sup>a</sup> Satoko Sota,<sup>a</sup> Nami Morishita,<sup>a</sup> Kazu Okumura,<sup>a</sup> and Miki Niwa<sup>b</sup>

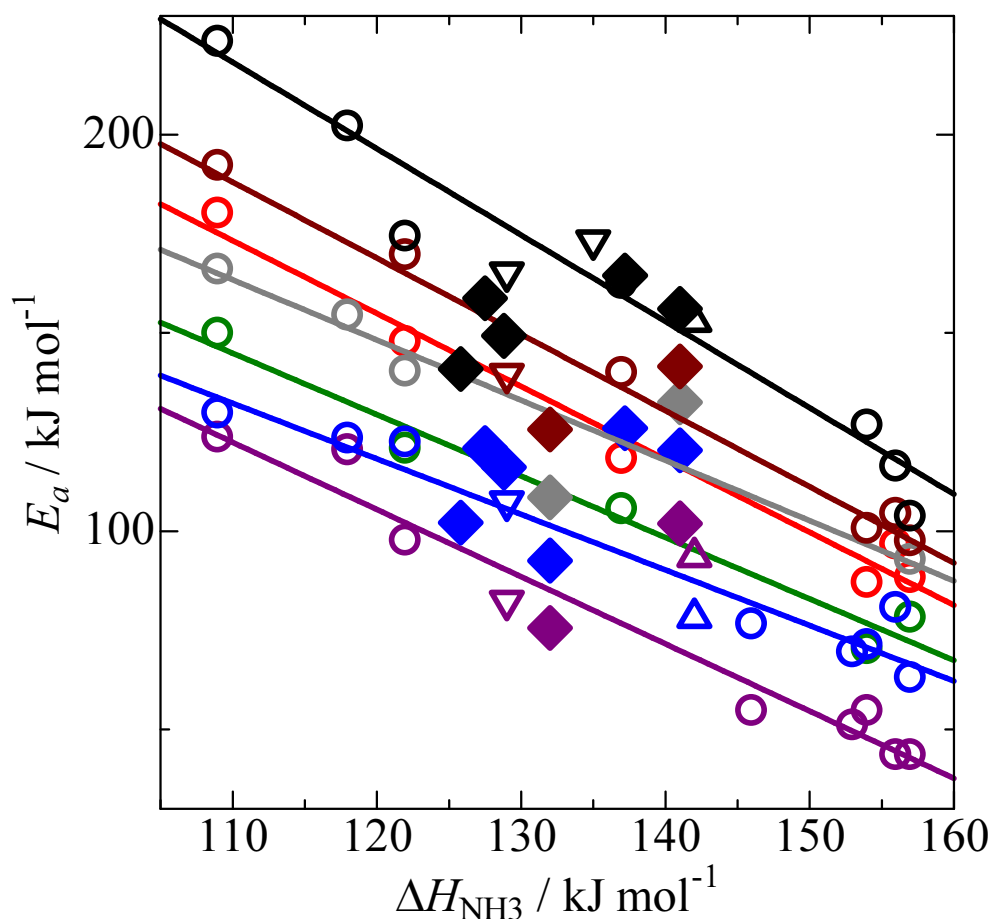

Figure S1. Plots of  $E_a$  of the reactions of nC3 (black), iC4 (red), nC4 (brown), iC5 (green), nC5 (grey), nC6 (blue) and nC8 (purple) over FAU (○), BEA (▽), MFI (◆) and MOR (△) zeolites against enthalpy of ammonia desorption.
